# Supplementary material for: Risk and clinical-outcome indicators of delirium in an emergency department intermediate care unit (EDIMCU): an observational prospective study
Source: PubMed Central journal article supplement (PMC3563452; doi:10.1186/1471-227x-13-2), 2013-01-29
Supplement: 1471-227X-13-2-S3.pdf [file 1471-227X-13-2-S3.pdf]

## Hypothesis Test Summary

|    | Null Hypothesis                                                                                           | Test                                    | Sig. | Decision                    |
|----|-----------------------------------------------------------------------------------------------------------|-----------------------------------------|------|-----------------------------|
| 1  | The distribution of Hemoglobin concentration at admission g/dl is the same across categories of Delirium. | Independent-Samples Mann-Whitney U Test | .038 | Reject the null hypothesis. |
| 2  | The distribution of Hemoglobin concentration at discharge g/dl is the same across categories of Delirium. | Independent-Samples Mann-Whitney U Test | .030 | Reject the null hypothesis. |
| 3  | The distribution of Hematocrit at admission is the same across categories of Delirium.                    | Independent-Samples Mann-Whitney U Test | .125 | Retain the null hypothesis. |
| 4  | The distribution of Hematocrit at admission is the same across categories of Delirium.                    | Independent-Samples Mann-Whitney U Test | .180 | Retain the null hypothesis. |
| 5  | The distribution of Total white blood cell count at admission is the same across categories of Delirium.  | Independent-Samples Mann-Whitney U Test | .749 | Retain the null hypothesis. |
| 6  | The distribution of Total white blood cell count at discharge is the same across categories of Delirium.  | Independent-Samples Mann-Whitney U Test | .844 | Retain the null hypothesis. |
| 7  | The distribution of C-Reactive Protein at admission is the same across categories of Delirium.            | Independent-Samples Mann-Whitney U Test | .089 | Retain the null hypothesis. |
| 8  | The distribution of C-Reactive Protein at discharge is the same across categories of Delirium.            | Independent-Samples Mann-Whitney U Test | .374 | Retain the null hypothesis. |
| 9  | The distribution of Sodium concentration at admission is the same across categories of Delirium.          | Independent-Samples Mann-Whitney U Test | .050 | Retain the null hypothesis. |
| 10 | The distribution of Sodium concentration at discharge is the same across categories of Delirium.          | Independent-Samples Mann-Whitney U Test | .132 | Retain the null hypothesis. |

Asymptotic significances are displayed. The significance level is .05.

<sup>1</sup>Exact significance is displayed for this test.

## Hypothesis Test Summary

|    | Null Hypothesis                                                                                        | Test                                    | Sig.              | Decision                    |
|----|--------------------------------------------------------------------------------------------------------|-----------------------------------------|-------------------|-----------------------------|
| 11 | The distribution of Potassium at admission is the same across categories of Delirium.                  | Independent-Samples Mann-Whitney U Test | .247              | Retain the null hypothesis. |
| 12 | The distribution of Potassium at discharge is the same across categories of Delirium.                  | Independent-Samples Mann-Whitney U Test | .803              | Retain the null hypothesis. |
| 13 | The distribution of Aspartate aminotransferase at admission is the same across categories of Delirium. | Independent-Samples Mann-Whitney U Test | .162              | Retain the null hypothesis. |
| 14 | The distribution of Alanine aminotransferase at admission is the same across categories of Delirium.   | Independent-Samples Mann-Whitney U Test | .811              | Retain the null hypothesis. |
| 15 | The distribution of Total bilirubin at admission is the same across categories of Delirium.            | Independent-Samples Mann-Whitney U Test | .285              | Retain the null hypothesis. |
| 16 | The distribution of Albumin at admission is the same across categories of Delirium.                    | Independent-Samples Mann-Whitney U Test | .498              | Retain the null hypothesis. |
| 17 | The distribution of Ammonia in the EDIMCU stay is the same across categories of Delirium.              | Independent-Samples Mann-Whitney U Test | .931 <sup>1</sup> | Retain the null hypothesis. |
| 18 | The distribution of Glucose at admission is the same across categories of Delirium.                    | Independent-Samples Mann-Whitney U Test | .088              | Retain the null hypothesis. |
| 19 | The distribution of Blood urea nitrogen at admission is the same across categories of Delirium.        | Independent-Samples Mann-Whitney U Test | .001              | Reject the null hypothesis. |
| 20 | The distribution of Blood urea nitrogen at discharge is the same across categories of Delirium.        | Independent-Samples Mann-Whitney U Test | .006              | Reject the null hypothesis. |

Asymptotic significances are displayed. The significance level is .05.

<sup>1</sup>Exact significance is displayed for this test.

## Hypothesis Test Summary

|    | Null Hypothesis                                                                                       | Test                                    | Sig. | Decision                    |
|----|-------------------------------------------------------------------------------------------------------|-----------------------------------------|------|-----------------------------|
| 21 | The distribution of Creatinine at admission is the same across categories of Delirium.                | Independent-Samples Mann-Whitney U Test | .006 | Reject the null hypothesis. |
| 22 | The distribution of Creatinine at discharge is the same across categories of Delirium.                | Independent-Samples Mann-Whitney U Test | .148 | Retain the null hypothesis. |
| 23 | The distribution of Arterial pH at admission is the same across categories of Delirium.               | Independent-Samples Mann-Whitney U Test | .264 | Retain the null hypothesis. |
| 24 | The distribution of Arterial PaO <sub>2</sub> at admission is the same across categories of Delirium. | Independent-Samples Mann-Whitney U Test | .865 | Retain the null hypothesis. |
| 25 | The distribution of Arterial pCO <sub>2</sub> at admission is the same across categories of Delirium. | Independent-Samples Mann-Whitney U Test | .458 | Retain the null hypothesis. |
| 26 | The distribution of Arterial ionized calcium at admission is the same across categories of Delirium.  | Independent-Samples Mann-Whitney U Test | .204 | Retain the null hypothesis. |
| 27 | The distribution of Arterial ionized calcium at discharge is the same across categories of Delirium.  | Independent-Samples Mann-Whitney U Test | .035 | Reject the null hypothesis. |
| 28 | The distribution of Osmolarity is the same across categories of Delirium.                             | Independent-Samples Mann-Whitney U Test | .001 | Reject the null hypothesis. |

Asymptotic significances are displayed. The significance level is .05.

<sup>1</sup>Exact significance is displayed for this test.
